# Supplementary material
Source: ML conference proceedings conference paper supplement (https://proceedings.mlr.press/v89/putta19a.html)
Supplement: Supplementary file [file putta19a-supp.pdf]

## A Supplementary Proofs

### A.1 Exp2 Regret Proofs

First, we directly analyze Exp2's regret for the two kinds of feedback.

#### A.1.1 Full Information

**Lemma 19.** *Let  $L_t(X) = X^\top l_t$ . If  $|\eta L_t(X)| \leq 1$  for all  $t \in [T]$  and  $X \in \{0, 1\}^n$ , the Exp2 algorithm satisfies for any  $X$ :*

$$\sum_{t=1}^T p_t^\top L_t - \sum_{t=1}^T L_t(X) \leq \eta \sum_{t=1}^T p_t^\top L_t^2 + \frac{n \log 2}{\eta}$$

*Proof.* (Adapted from [11] Theorem 1.5) Let  $Z_t = \sum_{Y \in \{0,1\}^n} w_t(Y)$ . We have:

$$\begin{aligned} Z_{t+1} &= \sum_{Y \in \{0,1\}^n} \exp(-\eta L_t(Y)) w_t(Y) \\ &= Z_t \sum_{Y \in \{0,1\}^n} \exp(-\eta L_t(Y)) p_t(Y) \end{aligned}$$

Since  $e^{-x} \leq 1 - x + x^2$  for  $x \geq -1$ , we have that  $\exp(-\eta L_t(Y)) \leq 1 - \eta L_t(Y) + \eta^2 L_t(Y)^2$  (Because we assume  $|\eta L_t(X)| \leq 1$ ). So,

$$\begin{aligned} Z_{t+1} &\leq Z_t \sum_{Y \in \{0,1\}^n} (1 - \eta L_t(Y) + \eta^2 L_t(Y)^2) p_t(Y) \\ &= Z_t (1 - \eta p_t^\top L_t + \eta^2 p_t^\top L_t^2) \end{aligned}$$

Using the inequality  $1 + x \leq e^x$ ,

$$Z_{t+1} \leq Z_t \exp(-\eta p_t^\top L_t + \eta^2 p_t^\top L_t^2)$$

Hence, we have:

$$Z_{T+1} \leq Z_1 \exp\left(-\sum_{t=1}^T \eta p_t^\top L_t + \sum_{t=1}^T \eta^2 p_t^\top L_t^2\right)$$

For any  $X \in \{0, 1\}^n$ ,  $w_{T+1}(X) = \exp(-\sum_{t=1}^T \eta L_t(X))$ . Since  $w_{T+1}(X) \leq Z_{T+1}$  and  $Z_1 = 2^n$ , we have:

$$\exp\left(-\sum_{t=1}^T \eta L_t(X)\right) \leq 2^n \exp\left(-\sum_{t=1}^T \eta p_t^\top L_t + \sum_{t=1}^T \eta^2 p_t^\top L_t^2\right)$$

Taking the logarithm on both sides manipulating this inequality, we get:

$$\sum_{t=1}^T p_t^\top L_t - \sum_{t=1}^T L_t(X) \leq \eta \sum_{t=1}^T p_t^\top L_t^2 + \frac{n \log 2}{\eta}$$

□

**Theorem 3.** *In the full information setting, if  $\eta = \sqrt{\frac{\log 2}{nT}}$ , Exp2 attains the regret bound:*

$$E[\mathcal{R}_T] \leq 2n^{3/2} \sqrt{T \log 2}$$

*Proof.* Using  $L_t(X) = X^\top l_t$  and applying expectation with respect to the randomness of the player to definition of regret, we get:

$$\begin{aligned} E[\mathcal{R}_T] &= \sum_{t=1}^T \sum_{X \in \{0,1\}^n} p_t(X) L_t(X) - \min_{X^* \in \{0,1\}^n} \sum_{t=1}^T L_t(X^*) \\ &= \sum_{t=1}^T p_t^\top L_t - \min_{X^* \in \{0,1\}^n} \sum_{t=1}^T L_t(X^*) \end{aligned}$$

Applying Lemma 19, we get  $E[\mathcal{R}_T] \leq \eta \sum_{t=1}^T p_t^\top L_t^2 + n \log 2 / \eta$ . Since  $|L_t(X)| \leq n$  for all  $X \in \{0, 1\}^n$ , we get  $\sum_{t=1}^T p_t^\top L_t^2 \leq Tn^2$ .

$$E[\mathcal{R}_T] \leq \eta T n^2 + \frac{n \log 2}{\eta}$$

Optimizing over the choice of  $\eta$ , we get the regret is bounded by  $2n^{3/2} \sqrt{T \log 2}$  if we choose  $\eta = \sqrt{\frac{\log 2}{nT}}$ .

To apply Lemma 19,  $|\eta L_t(X)| \leq 1$  for all  $t \in [T]$  and  $X \in \{0, 1\}^n$ . Since  $|L_t(X)| \leq n$ , we have  $\eta \leq 1/n$ . □

#### A.1.2 Bandit

**Lemma 20.** *Let  $\tilde{L}_t(X) = X^\top \tilde{l}_t$ , where  $\tilde{l}_t = P_t^{-1} X_t X_t^\top l_t$ . If  $|\eta \tilde{L}_t(X)| \leq 1$  for all  $t \in [T]$  and  $X \in \{0, 1\}^n$ , the Exp2 algorithm with uniform exploration satisfies for any  $X$*

$$\sum_{t=1}^T q_t^\top L_t - \sum_{t=1}^T L_t(X) \leq \eta \mathbb{E}\left[\sum_{t=1}^T q_t^\top \tilde{L}_t^2\right] + \frac{n \log 2}{\eta} + 2\gamma nT$$

*Proof.* We have that:

$$\begin{aligned} \sum_{t=1}^T q_t^\top \tilde{L}_t - \sum_{t=1}^T \tilde{L}_t(X) &= (1 - \gamma) \left( \sum_{t=1}^T p_t^\top \tilde{L}_t - \sum_{t=1}^T \tilde{L}_t(X) \right) \\ &\quad + \gamma \left( \sum_{t=1}^T \mu^\top \tilde{L}_t - \sum_{t=1}^T \tilde{L}_t(X) \right) \end{aligned}$$

Since the algorithm essentially runs Exp2 using the losses  $\tilde{L}_t(X)$  and  $|\eta \tilde{L}_t(X)| \leq 1$ , we can apply Lemma 19:

$$\begin{aligned} \sum_{t=1}^T q_t^\top \tilde{L}_t - \sum_{t=1}^T \tilde{L}_t(X) &\leq (1 - \gamma) \left( \frac{n \log 2}{\eta} + \eta \sum_{t=1}^T p_t^\top \tilde{L}_t^2 \right) \\ &\quad + \gamma \left( \sum_{t=1}^T \mu^\top \tilde{L}_t - \sum_{t=1}^T \tilde{L}_t(X) \right) \end{aligned}$$

Apply expectation with respect to  $X_t$ . Using the fact that  $\mathbb{E}[\tilde{l}_t] = l_t$  and  $\mu^\top L_t - L_t(X) \leq 2n$ :

$$\begin{aligned} \sum_{t=1}^T q_t^\top L_t - \sum_{t=1}^T L_t(X) &\leq (1-\gamma) \left( \frac{n \log 2}{\eta} + \eta \mathbb{E} \left[ \sum_{t=1}^T p_t^\top \tilde{L}_t^2 \right] \right) \\ &\quad + \gamma \left( \sum_{t=1}^T \mu^\top L_t - \sum_{t=1}^T L_t(X) \right) \\ &\leq \eta \mathbb{E} \left[ \sum_{t=1}^T q_t^\top \tilde{L}_t^2 \right] + \frac{n \log 2}{\eta} + 2\gamma n T \end{aligned}$$

□

**Theorem 4.** *In the bandit setting, if  $\eta = \sqrt{\frac{\log 2}{9n^2 T}}$  and  $\gamma = 4n^2 \eta$ , Exp2 with uniform exploration on  $\{0, 1\}^n$  attains the regret bound:*

$$\mathbb{E}[\mathcal{R}_T] \leq 6n^2 \sqrt{T \log 2}$$

*Proof.* Applying expectation with respect to the randomness of the player to the definition of regret, we get:

$$\begin{aligned} \mathbb{E}[\mathcal{R}_T] &= \mathbb{E} \left[ \sum_{t=1}^T L_t(X_t) - \min_{X^* \in \{0,1\}^n} L_t(X^*) \right] \\ &= \sum_{t=1}^T q_t^\top L_t - \min_{X^* \in \{0,1\}^n} \sum_{t=1}^T L_t(X^*) \end{aligned}$$

Applying Lemma 20

$$\mathbb{E}[\mathcal{R}_T] \leq \eta \mathbb{E} \left[ \sum_{t=1}^T q_t^\top \tilde{L}_t^2 \right] + \frac{n \log 2}{\eta} + 2\gamma n T$$

We follow the proof technique of [6] Theorem 4. We have that:

$$\begin{aligned} q_t^\top \tilde{L}_t^2 &= \sum_{X \in \{0,1\}^n} q_t(X) (X^\top \tilde{l}_t)^2 \\ &= \sum_{X \in \{0,1\}^n} q_t(X) (\tilde{l}_t^\top X X^\top \tilde{l}_t) \\ &= \tilde{l}_t^\top P_t \tilde{l}_t \\ &= \tilde{l}_t^\top X_t X_t^\top P_t^{-1} P_t P_t^{-1} X_t X_t^\top \tilde{l}_t \\ &= (X_t^\top \tilde{l}_t)^2 X_t^\top P_t^{-1} X_t \\ &\leq n^2 X_t^\top P_t^{-1} X_t = n^2 \text{Tr}(P_t^{-1} X_t X_t^\top) \end{aligned}$$

Taking expectation, we get  $E[q_t^\top \tilde{L}_t^2] \leq n^2 \text{Tr}(P_t^{-1} \mathbb{E}[X_t X_t^\top]) = n^2 \text{Tr}(P_t^{-1} P_t) = n^3$ . Hence,

$$\mathbb{E}[\mathcal{R}_T] \leq \eta n^3 T + \frac{n \log 2}{\eta} + 2\gamma n T$$

However, in order to apply Lemma 20, we need that  $|\eta X^\top \tilde{l}_t| \leq 1$ . We have that

$$|\eta X^\top \tilde{l}_t| = \eta |(X_t^\top l_t) X_t^\top P_t^{-1} X_t| \leq 1$$

As  $|X_t^\top l_t| \leq n$  and  $|X_t^\top X_t| \leq n$ , we get  $\eta n |X_t^\top P_t^{-1} X_t| \leq \eta n |X_t^\top X_t| \|P_t^{-1}\| \leq \eta n^2 \|P_t^{-1}\| \leq 1$ . The matrix  $P_t = (1-\gamma)\Sigma_t + \gamma\Sigma_\mu$ . The smallest eigenvalue of  $\Sigma_\mu$  is  $1/4$ [8]. So  $P_t \succeq \frac{\gamma}{4} I_n$  and  $P_t^{-1} \preceq \frac{4}{\gamma} I_n$ . We should have that  $\frac{4n^2 \eta}{\gamma} \leq 1$ . Substituting  $\gamma = 4n^2 \eta$  in the regret inequality, we get:

$$\begin{aligned} \mathbb{E}[\mathcal{R}_T] &\leq \eta n^3 T + 8\eta n^3 T + \frac{n \log 2}{\eta} \\ &\leq 9\eta n^3 T + \frac{n \log 2}{\eta} \end{aligned}$$

Optimizing over the choice of  $\eta$ , we get  $\mathbb{E}[\mathcal{R}_T] \leq 2n^2 \sqrt{9T \log 2}$  when  $\eta = \sqrt{\frac{\log 2}{9n^2 T}}$ . □

## A.2 Lower Bounds

### A.2.1 Full Information Lower bound

In the game between player and adversary, the player's strategy is to pick some probability distribution  $p_t \in \Delta(\{0, 1\}^n)$  for  $t = 1 \dots T$ . The adversary picks a density  $q_t$  over loss vectors  $l \in [-1, 1]^n$  for  $t = 1 \dots T$ . So player picks  $X_t \sim p_t$  and adversary picks  $l_t \sim q_t$ . The min max expected regret is:

$$\inf_{p_1 \dots p_T} \sup_{q_1 \dots q_T} \mathbb{E}_{l_t \sim q_t} \mathbb{E}_{X_t \sim p_t} \left[ \sum_{t=1}^T l_t^\top X_t - \min_X \sum_{t=1}^T l_t^\top X \right]$$

Let  $\mathbb{E}_{X_t \sim p_t} = x_t$ .

$$\inf_{p_1 \dots p_T} \sup_{q_1 \dots q_T} \mathbb{E}_{l_t \sim q_t} \left[ \sum_{t=1}^T l_t^\top x_t - \min_X \sum_{t=1}^T l_t^\top X \right]$$

**Theorem 12.** *For any learner there exists an adversary producing  $L_\infty$  losses such that the expected regret in the full information setting is:*

$$\mathbb{E}[\mathcal{R}_T] = \Omega\left(n\sqrt{T}\right).$$

*Proof.* We choose  $q_t$  to be the density such that  $l_{t,i}$  is a Rademacher random variable, ie,  $l_{t,i} = +1$  w.p.  $1/2$  and  $l_{t,i} = -1$  w.p.  $1/2$  for all  $t = 1 \dots T$  and  $i = [n]$ . So,

$$\begin{aligned} &\inf_{p_1 \dots p_T} \sup_{q_1 \dots q_T} \mathbb{E}_{l_t \sim q_t} \left[ \sum_{t=1}^T l_t^\top x_t - \min_X \sum_{t=1}^T l_t^\top X \right] \\ &\geq \inf_{p_1 \dots p_T} \mathbb{E}_{l_t} \left[ \sum_{t=1}^T l_t^\top x_t - \min_X \sum_{t=1}^T l_t^\top X \right] \end{aligned}$$

For our choice of  $q_t$ , we have  $\mathbb{E}_{l_t}[l_t^\top x_t] = 0$ . So,

$$\begin{aligned} & \inf_{p_1 \dots p_T} \mathbb{E}_{l_t} \left[ \sum_{t=1}^T l_t^\top x_t - \min_X \sum_{t=1}^T l_t^\top X \right] \\ &= \inf_{p_1 \dots p_T} \mathbb{E}_{l_t} \left[ - \min_X \sum_{t=1}^T l_t^\top X \right] \\ &= \mathbb{E}_{l_t} \left[ \max_X \sum_{t=1}^T l_t^\top X \right] \end{aligned}$$

Simplifying this, we get:

$$\begin{aligned} \mathbb{E}_{l_t} \left[ \max_X \sum_{t=1}^T l_t^\top X \right] &= \mathbb{E}_{l_t} \left[ \max_{X_1 \dots X_n} \sum_{t=1}^T \sum_{i=1}^n l_{t,i} X_i \right] \\ &= \mathbb{E}_{l_t} \left[ \sum_{i=1}^n \max_{X_i} \sum_{t=1}^T l_{t,i} X_i \right] \\ &= \sum_{i=1}^n \mathbb{E}_{l_{t,i}} \left[ \max_{X_i} \sum_{t=1}^T l_{t,i} X_i \right] \\ &= n \mathbb{E}_Y \left[ \max_x \sum_{t=1}^T Y_t x \right] \end{aligned}$$

Here  $Y$  is a Rademacher random vector of length  $T$  and  $x \in \{0, 1\}$ . We have that

$$\max_x \left[ \sum_{t=1}^T Y_t x \right] = \begin{cases} 0 & \text{If } \sum_{t=1}^T Y_t \leq 0 \\ \sum_{t=1}^T Y_t & \text{otherwise} \end{cases}$$

So

$$\begin{aligned} \mathbb{E}_Y \left[ \max_x \sum_{t=1}^T Y_t x \right] &= \mathbb{E}_Y \left[ \sum_{t=1}^T Y_t \mid \sum_{t=1}^T Y_t > 0 \right] \\ &= \frac{1}{2} \mathbb{E}_Y \left[ \left| \sum_{t=1}^T Y_t \right| \right] \end{aligned}$$

Using Khintchine's inequality, we have positive constants  $A$  and  $B$  such that:

$$A \left( \sum_{t=1}^T |1|^2 \right)^{1/2} \leq \mathbb{E}_Y \left[ \left| \sum_{t=1}^T Y_t \right| \right] \leq B \left( \sum_{t=1}^T |1|^2 \right)^{1/2}$$

Hence, the regret is lower bounded by  $\Omega(n\sqrt{T})$ .  $\square$

## A.2.2 Bandit Lower bound

**Theorem 13.** *For any learner there exists an adversary producing  $L_\infty$  losses such that the expected regret in the Bandit setting is:*

$$\mathbb{E}[\mathcal{R}_T] = \Omega\left(n^{3/2}\sqrt{T}\right).$$

*Proof.* We consider  $2^n$  stochastic adversaries indexed by  $X \in \{0, 1\}^n$ . Adversary  $X$  draws losses as follows:

$$l_{t,i} = \begin{cases} \begin{cases} +1 \text{ w.p } \frac{1}{2} + \epsilon \\ -1 \text{ w.p } \frac{1}{2} - \epsilon \end{cases} & \text{if } X_i = 0 \\ \begin{cases} +1 \text{ w.p } \frac{1}{2} - \epsilon \\ -1 \text{ w.p } \frac{1}{2} + \epsilon \end{cases} & \text{if } X_i = 1 \end{cases}$$

Let  $\tilde{l}_t = [X_1^\top l_{t,1}, X_2^\top l_{t,2}, \dots, X_n^\top l_{t,n}]$ . We consider deterministic algorithms, ie  $X_t$  is a deterministic function of  $\tilde{l}_{t-1}$ . So, the only the adversary's randomness remains. The obtained result can be extended to randomized algorithms via application of Fubini's Theorem. Let  $E_X$  denote the expectation conditioned on adversary  $X$ . When playing against adversary  $X$ , the vector  $X$  is the best action in expectation. The expected regret when playing against adversary  $X$ .

$$\begin{aligned} \mathbb{E}_X[\mathcal{R}_T] &= \mathbb{E}_X \left[ \sum_{t=1}^T l_t^\top X_t - \min_{X^*} \sum_{t=1}^T l_t^\top X^* \right] \\ &\geq \mathbb{E}_X \left[ \sum_{t=1}^T l_t^\top X_t - \sum_{t=1}^T l_t^\top X \right] \\ &= 2\epsilon \sum_{i=1}^n \mathbb{E}_X \left[ \sum_{t=1}^T \mathbf{1}(X_{i,t} \neq X_i) \right] \\ &= 2\epsilon T \sum_{i=1}^n \left( 1 - \frac{\mathbb{E}_X[\sum_{t=1}^T \mathbf{1}(X_{i,t} = X_i)]}{T} \right) \end{aligned}$$

$\sum_{t=1}^T \mathbf{1}(X_{i,t} = X_i)/T$  is the empirical mean of playing  $X_i$ . Let  $J_i$  be a Bernoulli random drawn according to this mean. Hence,

$$\mathbb{E}_X[\mathcal{R}_T] \geq 2\epsilon T \sum_{i=1}^n (1 - \mathbb{P}_X(J_i = X_i))$$

Taking the average over adversaries:

$$\begin{aligned} \mathbb{E}[\mathcal{R}_T] &= \frac{1}{2^n} \sum_X \mathbb{E}_X[\mathcal{R}_T] \\ &\geq 2\epsilon T \sum_{i=1}^n \left( 1 - \frac{1}{2^n} \sum_X \mathbb{P}_X(J_i = X_i) \right) \end{aligned}$$

Let  $X^{\oplus i}$  be the vector  $X$  with the  $i$ 'th bit flipped. Using Pinsker's inequality, we have that:

$$\mathbb{P}_X(J_i = X_i) \leq \mathbb{P}_{X^{\oplus i}}(J_i = X_i) + \sqrt{\frac{1}{2} KL(\mathbb{P}_{X^{\oplus i}} \parallel \mathbb{P}_X)}$$

Taking the summation, and using the concavity of square root:

$$\frac{1}{2^n} \sum_X \mathbb{P}_X(J_i = X_i) \leq \frac{1}{2} + \sqrt{\frac{1}{2} \frac{1}{2^n} \sum_X KL(\mathbb{P}_{X^{\oplus i}} \parallel \mathbb{P}_X)}$$

The sequence of observed losses  $\tilde{l}_T \in \{-n, \dots, +n\}^T$  determines the empirical distribution of plays. Let  $\mathbb{P}_X^T$  be the law of  $\tilde{l}_T$  when playing against adversary  $X$ . So, using the chain rule of Kullback Leibler divergence:

$$\begin{aligned} KL(\mathbb{P}_{X^{\oplus i}} \|\mathbb{P}_X) &\leq KL(\mathbb{P}_{X^{\oplus i}}^T \|\mathbb{P}_X^T) \\ &= KL(\mathbb{P}_{X^{\oplus i}}^1 \|\mathbb{P}_X^1) \\ &+ \sum_{t=2}^T \sum_{\tilde{l}_{t-1}} \mathbb{P}_{X^{\oplus i}}^{t-1}(\tilde{l}_{t-1}) KL(\mathbb{P}_{X^{\oplus i}}^t(\cdot|\tilde{l}_{t-1}) \|\mathbb{P}_X^t(\cdot|\tilde{l}_{t-1})) \\ &= KL(\mathcal{B}_0 \|\mathcal{B}'_0) \mathbf{1}(X_{1,i} = X_i) \\ &+ \sum_{t=T}^t \sum_{\tilde{l}_{t-1}: X_{t,i}=X_i} \mathbb{P}_{X^{\oplus i}}^{t-1}(\tilde{l}_{t-1}) KL(\mathcal{B}_{\tilde{l}_{t-1}} \|\mathcal{B}'_{\tilde{l}_{t-1}}) \end{aligned}$$

Here,  $\mathcal{B}_{\tilde{l}_{t-1}}, \mathcal{B}'_{\tilde{l}_{t-1}}$  are sums of at most  $n$  Bernoulli random variables such that their means agree on all coordinates except  $i$ . Using Lemma 24 from [2], we get that:

$$KL(\mathcal{B}_{\tilde{l}_{t-1}} \|\mathcal{B}'_{\tilde{l}_{t-1}}) \leq \frac{16\epsilon^2}{n}$$

Substituting this back into the previous expression, we get:

$$\begin{aligned} KL(\mathbb{P}_{X^{\oplus i}} \|\mathbb{P}_X) &\leq \frac{16\epsilon^2}{n} \sum_{t=1}^T \sum_{\tilde{l}_{1:t-1}: X_{t,i}=X_i} \mathbb{P}_{X^{\oplus i}}^t(\tilde{l}_{1:t-1}) \\ &\leq \frac{16\epsilon^2}{n} \sum_{t=1}^T \mathbb{E}_{X^{\oplus i}}(\mathbf{1}(X_{t,i} = X_i)) \\ &= \frac{16\epsilon^2}{n} T \mathbb{P}_{X^{\oplus i}}(J_i = X_i) \end{aligned}$$

Taking the summation, we have:

$$\frac{1}{2^n} \sum_X KL(\mathbb{P}_{X^{\oplus i}} \|\mathbb{P}_X) \leq \frac{8\epsilon^2}{n} T$$

Substituting this in the regret inequality:

$$\begin{aligned} \mathbb{E}[\mathcal{R}_T] &\geq 2\epsilon T \sum_{i=1}^n \left( 1 - \frac{1}{2} - \sqrt{\frac{4\epsilon^2 T}{n}} \right) \\ &= 2\epsilon T n \left( \frac{1}{2} - 2\epsilon \sqrt{\frac{T}{n}} \right) \end{aligned}$$

Optimizing over  $\epsilon$ , we get that  $\mathbb{E}[\mathcal{R}_T] = \Omega(n^{3/2}\sqrt{T})$   $\square$

### A.3 $\{-1, +1\}^n$ Hypercube Case

**Lemma 21.** *Exp2 on  $\{-1, +1\}^n$  with losses  $l_t$  is equivalent to Exp2 on  $\{0, 1\}^n$  with losses  $2l_t$  while using the map  $2X_t - \mathbf{1}$  to play on  $\{-1, +1\}^n$ .*

*Proof.* Consider the update equation for Exp2 on  $\{-1, +1\}^n$

$$p_{t+1}(Z) = \frac{\exp(-\eta \sum_{\tau=1}^t Z^\top l_\tau)}{\sum_{W \in \{-1, +1\}^n} \exp(-\eta \sum_{\tau=1}^t W^\top l_\tau)}$$

$Z \in \{-1, +1\}^n$  can be mapped to a  $X \in \{0, 1\}^n$  using the bijective map  $X = (Z + \mathbf{1})/2$ . So:

$$\begin{aligned} p_{t+1}(Z) &= \frac{\exp(-\eta \sum_{\tau=1}^t (2X - \mathbf{1})^\top l_\tau)}{\sum_{Y \in \{0, 1\}^n} \exp(-\eta \sum_{\tau=1}^t (2Y - \mathbf{1})^\top l_\tau)} \\ &= \frac{\exp(-\eta \sum_{\tau=1}^t X^\top (2l_\tau))}{\sum_{Y \in \{0, 1\}^n} \exp(-\eta \sum_{\tau=1}^t Y^\top (2l_\tau))} \end{aligned}$$

This is equivalent to updating the Exp2 on  $\{0, 1\}^n$  with the loss vector  $2l_t$ .  $\square$

**Theorem 14.** *Exp2 on  $\{-1, +1\}^n$  using the sequence of losses  $l_t$  is equivalent to PolyExp on  $\{0, 1\}^n$  using the sequence of losses  $2\tilde{l}_t$ . Moreover, the regret of Exp2 on  $\{-1, +1\}^n$  will equal the regret of PolyExp using the losses  $2\tilde{l}_t$ .*

*Proof.* After sampling  $X_t$ , we play  $Z_t = 2X_t - \mathbf{1}$ . So  $\Pr(X_t = X) = \Pr(Z_t = 2X - \mathbf{1})$ . In full information,  $2\tilde{l}_t = 2l_t$  and in the bandit case  $\mathbb{E}[2\tilde{l}_t] = 2l_t$ . Since  $2\tilde{l}_t$  is used to update the algorithm, by Lemma 21 we have that  $\Pr(X_{t+1} = X) = \Pr(Z_{t+1} = 2X - \mathbf{1})$ . By equivalence of Exp2 to PolyExp, the first statement follows immediately.

Let  $Z^* = \min_{Z \in \{-1, +1\}^n} \sum_{t=1}^T Z^\top l_t$  and  $2X^* = Z^* + \mathbf{1}$ . The regret of Exp2 on  $\{-1, +1\}^n$  is:

$$\begin{aligned} \sum_{t=1}^T l_t^\top (Z_t - Z^*) &= \sum_{t=1}^T l_t^\top (2X_t - \mathbf{1} - 2X^* + \mathbf{1}) \\ &= \sum_{t=1}^T (2l_t)^\top (X_t - X^*) \end{aligned}$$

$\square$
